# Supplementary material for: Toward the automated generation of genome-scale metabolic networks in the SEED
Source: PubMed Central journal article supplement (PMC1868769; doi:10.1186/1471-2105-8-139), 2007-04-26
Supplement: 1471-2105-8-139-S1.pdf [file 1471-2105-8-139-S1.pdf]

**Reverse-engineering reactions from *E. coli*, *H. pylori*, and *L. lactis* models after *S. aureus* model curation**

|                                  |                                        | <i>E. coli</i>                        | <i>H. pylori</i> | <i>L. lactis</i> |     |
|----------------------------------|----------------------------------------|---------------------------------------|------------------|------------------|-----|
| Reactions to Reverse Engineer    | Total Number of Reactions <sup>a</sup> | 648                                   | 357              | 467              |     |
|                                  | Reaction Counts                        |                                       |                  |                  |     |
|                                  | Reactions to Add “As is” <sup>b</sup>  | 54                                    | 33               | 45               |     |
|                                  | Reactions to Map to Functional Roles   | In Curated Subsystems <sup>c</sup>    | 406              | 264              | 320 |
|                                  |                                        | In Additional Subsystems <sup>d</sup> | 108              | 28               | 30  |
| Remaining Reactions <sup>e</sup> |                                        | 80                                    | 32               | 72               |     |

- <sup>a.</sup> Reaction total does not include transport and exchange reactions, and “dead end” reactions (*i.e.*, reactions whose substrates are never produced or whose products are never consumed) specified by the published models.
- <sup>b.</sup> Reactions in respective models that combine many reactions into one for synthesis of organism-specific properties (e.g., fatty acid synthesis).
- <sup>c.</sup> Reactions in the models that map to functional roles in the 65 subsystems curated for *S. aureus* network generation.
- <sup>d.</sup> Reactions in the models that map to functional roles in existing subsystems that were not curated in association with *S. aureus* network generation.
- <sup>e.</sup> Reactions not yet associated with functional roles in subsystems.
