# Supplementary material for: Toward the automated generation of genome-scale metabolic networks in the SEED
Source: PubMed Central journal article supplement (PMC1868769; doi:10.1186/1471-2105-8-139), 2007-04-26
Supplement: 1471-2105-8-139-S2.pdf [file 1471-2105-8-139-S2.pdf]

**Subsystems and scenarios used in reaction network generation**

| Category                                                       | Subsystem                                           | Abbreviation                         | Scenario                                                                                                        | <i>S. aureus</i>                   | <i>E. coli</i> | <i>H. pylori</i>              | <i>L. lactis</i> |   |   |  |
|----------------------------------------------------------------|-----------------------------------------------------|--------------------------------------|-----------------------------------------------------------------------------------------------------------------|------------------------------------|----------------|-------------------------------|------------------|---|---|--|
| AminoAcids                                                     | Ammonia assimilation                                | NH3 assim                            | NH3 to Glutamine                                                                                                | x                                  | x              |                               |                  |   |   |  |
|                                                                | Arginine Biosynthesis                               | Arginine                             | Arginine synthesis                                                                                              | x                                  | x              |                               |                  |   |   |  |
|                                                                | Arginine Putrescine and 4-aminobutyrate degradation | ArgPut deg                           | Arginine to Proline<br>Arginine to Putrescine                                                                   | x                                  | x              |                               |                  |   |   |  |
|                                                                | Branched-Chain Amino Acid Biosynthesis              | Branched AA                          | Isoleucine Leucine Valine synthesis<br>Oxoisovalerate generation                                                | x                                  | x              |                               | x                |   |   |  |
|                                                                | Chorismate Synthesis                                | Chorismate                           | Chorismate synthesis                                                                                            | x                                  | x              | x                             | x                |   |   |  |
|                                                                | Glutamate, aspartate and asparagine biosynthesis    | GluAspAsn                            | Asparagine synthesis<br>Aspartate synthesis<br>Glutamate racemase<br>Glutamate synthesis<br>Glutamine synthesis | x                                  | x              | x                             | x                |   |   |  |
|                                                                | Histidine Biosynthesis                              | Histidine                            | Histidine synthesis                                                                                             | x                                  | x              |                               | x                |   |   |  |
|                                                                | Histidine Degradation                               | Hist deg                             | Histidine to Glutamate                                                                                          | x                                  |                |                               |                  |   |   |  |
|                                                                | Isoleucine degradation                              | Isoleu deg                           | Isoleucine to 2MethylbutyrylCoA<br>Isoleucine to PropanoylCoA                                                   | x                                  |                |                               |                  |   |   |  |
|                                                                | Leucine Degradation and HMG-CoA Metabolism          | Leucine deg                          | Leucine to IsovalerylCoA                                                                                        | x                                  |                |                               |                  |   |   |  |
|                                                                | Lysine Biosynthesis DAP Pathway                     | Lysine                               | LL 2 6 Diaminoheptanedioate generation<br>Lysine synthesis                                                      | x                                  | x              | x                             | x                |   |   |  |
|                                                                | Methionine Biosynthesis                             | Methionine                           | Methionine synthesis from homoserine<br>Methionine to Adenosyl Methionine                                       | x                                  | x              | x                             | x                |   |   |  |
|                                                                | Methionine Salvage                                  | MethSalvage                          | incomplete scenario                                                                                             | x                                  | x              |                               |                  |   |   |  |
|                                                                | Phenylalanine synthesis                             | Phenylalanine                        | Phenylalanine synthesis                                                                                         | x                                  |                |                               |                  |   |   |  |
|                                                                | Polyamine Metabolism                                | Polyamine                            | Putrescine to Spermine                                                                                          | x                                  |                |                               |                  |   |   |  |
|                                                                | Pyruvate Alanine Serine Interconversions            | PyrAlaSer                            | Alanine Synthesis                                                                                               | x                                  |                |                               |                  |   |   |  |
|                                                                | Serine Biosynthesis                                 | Serine                               | Glycine synthesis<br>Serine synthesis                                                                           | x                                  | x              | x                             | x                |   |   |  |
|                                                                | Threonine degradation                               | Threon deg                           | Threonine to Glycine and Acetaldehyde<br>Threonine to Oxobutanoate                                              | x                                  |                |                               | x                |   |   |  |
|                                                                | Threonine synthesis                                 | Threonine                            | Homoserine generation<br>Threonine synthesis                                                                    | x                                  | x              | x                             | x                |   |   |  |
|                                                                | Tryptophan synthesis                                | Tryptophan                           | Tryptophan synthesis                                                                                            | x                                  | x              | x                             | x                |   |   |  |
|                                                                | Tyrosine synthesis                                  | Tyrosine                             | Tyrosine synthesis                                                                                              | x                                  | x              |                               |                  |   |   |  |
|                                                                | Valine degradation                                  | Valine deg                           | Valine to IsobutyrylCoA                                                                                         | x                                  |                |                               |                  |   |   |  |
|                                                                | cysteine biosynthesis                               | cysteine                             | Cysteine synthesis                                                                                              | x                                  | x              |                               | x                |   |   |  |
|                                                                | Carbohydrates                                       | Embden-Meyerhof and Gluconeogenesis  | EMP                                                                                                             | Fructose16BP entry point           | x              | x                             |                  | x |   |  |
|                                                                |                                                     |                                      |                                                                                                                 | Fructose6P entry point             | x              | x                             |                  | x |   |  |
|                                                                |                                                     |                                      |                                                                                                                 | GAP entry point                    | x              | x                             |                  | x |   |  |
|                                                                |                                                     |                                      |                                                                                                                 | Gluconeogenesis                    | x              | x                             | x                |   |   |  |
|                                                                |                                                     |                                      |                                                                                                                 | Glucose6P generation               | x              | x                             | x                | x |   |  |
|                                                                |                                                     |                                      |                                                                                                                 | Glycerate3P generation             | x              | x                             |                  |   |   |  |
|                                                                |                                                     |                                      |                                                                                                                 | GlyceroneP entry point             | x              | x                             |                  | x |   |  |
|                                                                |                                                     |                                      |                                                                                                                 | GlyceroneP generation              | x              | x                             |                  | x |   |  |
|                                                                |                                                     |                                      |                                                                                                                 | Glycolysis                         | x              | x                             |                  | x |   |  |
|                                                                |                                                     |                                      |                                                                                                                 | PEP generation                     | x              | x                             |                  | x |   |  |
|                                                                |                                                     | Entner-Doudoroff Pathway             | EntnerDoff                                                                                                      | Glucuronate to PhosphoDGluconate   | x              | x                             |                  |   |   |  |
| Fermentations: Lactate                                         |                                                     | FermLac                              |                                                                                                                 | Bifidium precursors                |                |                               |                  | x |   |  |
|                                                                |                                                     |                                      |                                                                                                                 | Heterofermentation precursors      |                |                               |                  | x |   |  |
| Fermentations: Mixed acid                                      |                                                     | FermMixed                            |                                                                                                                 | PEP to Formate                     | x              | x                             |                  |   |   |  |
|                                                                |                                                     |                                      |                                                                                                                 | Fructose utilization               | x              | x                             |                  | x |   |  |
| Galactose degradation                                          |                                                     | Lactose                              | Lactose6P utilization                                                                                           | x                                  |                |                               |                  |   |   |  |
| Glycerol and Glycerol-3-phosphate Uptake and Utilization       |                                                     | Glycerol                             | Glycerol3P and Glycerol to GlyceroneP                                                                           | x                                  | x              |                               | x                |   |   |  |
| Mannitol Utilization                                           |                                                     | Mannitol                             | Fructose6P generation                                                                                           | x                                  | x              |                               | x                |   |   |  |
| Mannose Metabolism                                             |                                                     | Mannose                              |                                                                                                                 | Fructose6P generation              | x              | x                             |                  | x |   |  |
|                                                                |                                                     |                                      |                                                                                                                 | Erythrose4P generation             | x              | x                             |                  |   |   |  |
| Pentose phosphate pathway                                      |                                                     | PPP                                  |                                                                                                                 | Glycolysis bypass                  | x              | x                             |                  |   |   |  |
|                                                                |                                                     |                                      |                                                                                                                 | PRPP generation                    | x              | x                             |                  | x |   |  |
|                                                                |                                                     |                                      |                                                                                                                 | PhosphoDGluconate entry point      | x              | x                             |                  | x |   |  |
|                                                                |                                                     |                                      |                                                                                                                 | Xylulose5P generation              | x              | x                             |                  | x |   |  |
|                                                                |                                                     |                                      |                                                                                                                 | PEP generation                     | x              | x                             |                  |   |   |  |
| Pyruvate metabolism I: anaplerotic reactions, PEP              |                                                     | PyrMetab 1                           |                                                                                                                 | PEP to TCA metabolites             | x              | x                             |                  |   |   |  |
|                                                                |                                                     |                                      |                                                                                                                 | Pyruvate generation                | x              | x                             |                  |   |   |  |
| Pyruvate metabolism II: acetyl-CoA, acetogenesis from pyruvate |                                                     | PyrMetab II                          |                                                                                                                 | Pyruvate to TCA metabolites        | x              | x                             |                  |   |   |  |
|                                                                |                                                     |                                      |                                                                                                                 | Acetate to Acetaldehyde            | x              | x                             |                  | x |   |  |
| Sucrose Metabolism                                             |                                                     | Sucrose                              |                                                                                                                 | AcetylCoA generation               | x              | x                             |                  | x |   |  |
|                                                                |                                                     |                                      |                                                                                                                 | Sucrose6P and Glucose to Glucose6P | x              | x                             | x                | x |   |  |
| TCA Cycle                                                      |                                                     | TCA                                  |                                                                                                                 | UDPGlucose generation              | x              | x                             |                  |   |   |  |
|                                                                |                                                     |                                      |                                                                                                                 | Fumarate entry point               | x              | x                             | x                |   |   |  |
|                                                                |                                                     |                                      |                                                                                                                 | Oxaloacetate to Succinate          | x              | x                             | x                |   |   |  |
|                                                                | Oxoglutarate generation                             |                                      |                                                                                                                 | x                                  | x              | x                             |                  |   |   |  |
|                                                                | SuccinylCoA entry point                             |                                      |                                                                                                                 | x                                  | x              |                               |                  |   |   |  |
| Trehalose Uptake and Utilization                               | Trehalose                                           | Trehalose6P to Glucose and Glucose6P | x                                                                                                               | x                                  |                |                               |                  |   |   |  |
| Cell Wall                                                      | Peptidoglycan Biosynthesis                          | Peptidogly                           | UDP N acetyl muramate generation                                                                                | x                                  | x              | x                             | x                |   |   |  |
|                                                                |                                                     |                                      | D glucosamine1P                                                                                                 | x                                  | x              | x                             | x                |   |   |  |
|                                                                |                                                     |                                      | N acetyl D glucosamine1P generation                                                                             | x                                  | x              | x                             | x                |   |   |  |
|                                                                |                                                     |                                      | UDP N acetyl D galactosamine generation                                                                         | x                                  | x              | x                             | x                |   |   |  |
|                                                                |                                                     |                                      | UDP N acetyl D glucosamine generation                                                                           | x                                  | x              | x                             | x                |   |   |  |
|                                                                |                                                     |                                      | UDP N acetyl D mannosamine generation                                                                           | x                                  | x              |                               | x                |   |   |  |
|                                                                |                                                     |                                      | CDPGlycerol generation                                                                                          | x                                  |                |                               | x                |   |   |  |
|                                                                |                                                     |                                      | Diglycerol diacylglycerol generation                                                                            | x                                  |                |                               |                  |   |   |  |
|                                                                |                                                     |                                      | Lipids                                                                                                          | Fatty Acid Biosynthesis FASII      | FattySynth     | Malonyl CoA generation        | x                | x | x |  |
|                                                                |                                                     |                                      |                                                                                                                 |                                    |                | CDP diacylglycerol generation | x                | x |   |  |
| Cardiolipin synthesis                                          | x                                                   | x                                    |                                                                                                                 |                                    |                |                               |                  |   |   |  |
| Diacylglycerol synthesis                                       | x                                                   | x                                    |                                                                                                                 |                                    |                |                               |                  |   |   |  |
| For 3 D Glucosyl 1 2 diacylglycerol generation                 | x                                                   | x                                    |                                                                                                                 |                                    |                | x                             | x                |   |   |  |
| Phosphatidylethanolamine synthesis                             | x                                                   | x                                    |                                                                                                                 |                                    |                |                               |                  |   |   |  |
| Phosphatidylglycerol generation                                | x                                                   | x                                    |                                                                                                                 |                                    |                |                               |                  |   |   |  |
| Nitrogen Metabolism                                            | Nitrate and nitrite ammonification                  | Nitrate                              | Phosphatidylserine synthesis                                                                                    | x                                  | x              |                               |                  |   |   |  |
|                                                                |                                                     |                                      | Hexadecanoate to AcetylCoA                                                                                      | x                                  | x              |                               |                  |   |   |  |
| Nitrogen Metabolism                                            | Nitrate and nitrite ammonification                  | Nitrate                              | Nitrite to Ammonia reduction                                                                                    | x                                  | x              |                               |                  |   |   |  |

| Category                                   | Subsystem                                   | Abbreviation                      | Scenario                             | <i>S. aureus</i> | <i>E. coli</i> | <i>H. pylori</i> | <i>L. lactis</i> |   |
|--------------------------------------------|---------------------------------------------|-----------------------------------|--------------------------------------|------------------|----------------|------------------|------------------|---|
| Nucleotide metabolism                      | De Novo Purine Biosynthesis                 | IMP                               | AICAR to IMP                         | x                | x              |                  | x                |   |
|                                            |                                             |                                   | IMP synthesis                        | x                | x              |                  | x                |   |
|                                            | De Novo Pyrimidine Synthesis                | UMP                               | UMP synthesis from CarbamoylP        | x                | x              | x                | x                |   |
|                                            |                                             |                                   | UMP synthesis from Glutamine         | x                | x              | x                | x                |   |
|                                            | Purine conversions                          | Purines                           | ADP generation                       | x                | x              | x                | x                |   |
|                                            |                                             |                                   | AMP generation                       | x                | x              | x                | x                |   |
|                                            |                                             |                                   | Adenine to AMP                       | x                | x              | x                | x                |   |
|                                            |                                             |                                   | AdenosinePP to AMP                   | x                | x              | x                | x                |   |
|                                            |                                             |                                   | GDP generation                       | x                | x              | x                | x                |   |
|                                            |                                             |                                   | GMP generation                       | x                | x              | x                | x                |   |
|                                            |                                             |                                   | GTP generation                       | x                | x              | x                | x                |   |
|                                            |                                             |                                   | dAMP generation                      | x                | x              | x                | x                |   |
|                                            |                                             |                                   | dGMP generation                      | x                | x              | x                | x                |   |
|                                            |                                             |                                   | dADP generation                      | x                | x              | x                | x                |   |
|                                            | Ribonucleotide reduction                    | RiboReduc                         | dCTP generation                      | x                | x              |                  | x                |   |
|                                            |                                             |                                   | dGDP generation                      | x                | x              | x                | x                |   |
|                                            | Ribose and deoxyribose phosphate metabolism | (Deoxy)Rib                        | Deoxyribose1P generation             | x                | x              |                  | x                |   |
|                                            |                                             |                                   | Ribose5P generation                  | x                | x              |                  | x                |   |
|                                            | pyrimidine conversions                      | Pyrimidines                       | CMP generation                       | x                | x              |                  | x                |   |
|                                            |                                             |                                   | CTP generation                       | x                | x              | x                | x                |   |
| dCMP generation                            |                                             |                                   | x                                    | x                |                | x                |                  |   |
| dTMP generation                            |                                             |                                   | x                                    | x                |                | x                |                  |   |
| Glycine cleavage system                    | Gly cleavage                                | Glycine cleavage                  | x                                    | x                |                |                  |                  |   |
|                                            |                                             | Formyltetrahydrofolate generation | x                                    |                  |                | x                |                  |   |
| One Carbon                                 | One-carbon metabolism by tetrahydropterines | One carbon                        | Methylenetetrahydrofolate generation | x                |                |                  | x                |   |
|                                            |                                             |                                   | Methyltetrahydrofolate generation    | x                | x              |                  | x                |   |
|                                            |                                             |                                   | Tetrahydrofolate generation          | x                | x              | x                | x                |   |
|                                            |                                             |                                   | <i>no scenario</i>                   |                  |                |                  |                  |   |
| Redox                                      | Dehydrogenase complexes                     | Dehydro                           | <i>no scenario</i>                   |                  |                |                  |                  |   |
|                                            |                                             |                                   | FOF1 type ATP synthase               | ATP              |                |                  |                  |   |
|                                            |                                             |                                   | Formate hydrogenase                  | Formate          | x              | x                |                  |   |
|                                            |                                             |                                   | Respiratory dehydrogenases 1         | RespDH           | x              | x                |                  | x |
|                                            |                                             |                                   | Succinate dehydrogenase              | FAD dehydro      | x              | x                | x                |   |
| Sulfur                                     | Inorganic Sulfur Assimilation               | Sulfide                           | Sulfate to Sulfide                   | x                | x              |                  |                  |   |
|                                            |                                             |                                   | Coenzyme A Biosynthesis              | CoA              | x              | x                | x                |   |
| Vitamins and Cofactors                     | FMN and FAD biosynthesis                    | FMN/FAD                           | FAD synthesis                        | x                |                |                  |                  |   |
|                                            |                                             |                                   | Folate Biosynthesis                  | Folate           | x              | x                |                  | x |
|                                            | Isoprenoid Biosynthesis                     | FarnesyIPP                        | DOXP pathway                         | x                | x              |                  |                  |   |
|                                            |                                             |                                   | Mevalonate pathway                   | x                |                |                  | x                |   |
|                                            | NAD and NADP cofactor biosynthesis global   | NAD/NADP                          | De novo from Trp and Asp             |                  | x              |                  |                  |   |
|                                            |                                             |                                   | Nicotinamide to NAD                  | x                | x              |                  | x                |   |
| Nicotinamide to NADP                       |                                             |                                   | x                                    | x                |                | x                |                  |   |
| Porphyrin, Heme, and Siroheme Biosynthesis | Heme                                        | Heme synthesis                    | x                                    |                  |                |                  |                  |   |
|                                            |                                             | Siroheme synthesis                | x                                    | x                |                |                  |                  |   |
