# Supplementary material for: Toward the automated generation of genome-scale metabolic networks in the SEED
Source: PubMed Central journal article supplement (PMC1868769; doi:10.1186/1471-2105-8-139), 2007-04-26
Supplement: 1471-2105-8-139-S3.pdf [file 1471-2105-8-139-S3.pdf]

**Reverse-engineering reactions from *H. pylori* and *L. lactis* models after *S. aureus* and *E. coli* model curation<sup>a</sup>**

|                                  |                                        | <i>H. pylori</i>                      | <i>L. lactis</i> |     |
|----------------------------------|----------------------------------------|---------------------------------------|------------------|-----|
| Reactions to Reverse Engineer    | Total Number of Reactions <sup>b</sup> | 357                                   | 467              |     |
|                                  |                                        |                                       | Reaction Counts  |     |
|                                  | Reactions to Add “As is” <sup>c</sup>  | 33                                    | 45               |     |
|                                  | Reactions to Map to Functional Roles   | In Curated Subsystems <sup>d</sup>    | 303              | 360 |
|                                  |                                        | In Additional Subsystems <sup>e</sup> | 1                | 7   |
| Remaining Reactions <sup>f</sup> |                                        | 20                                    | 55               |     |

<sup>a.</sup> Projected; *E. coli* curation is ongoing.

<sup>b.</sup> Reaction total does not include transport and exchange reactions, and “dead end” reactions (*i.e.*, reactions whose substrates are never produced or whose products are never consumed) specified by the published models.

<sup>c.</sup> Reactions in respective models that combine many reactions into one for synthesis of organism-specific properties (e.g., fatty acid synthesis).

<sup>d.</sup> Reactions in the models that map to functional roles in subsystems curated for *S. aureus* and *E. coli* network generation.

<sup>e.</sup> Reactions in the models that map to functional roles in existing subsystems that were not curated in association with *S. aureus* and *E. coli* network generation.

<sup>f.</sup> Reactions not yet associated with functional roles in subsystems.
