# Supplementary material for: Toward the automated generation of genome-scale metabolic networks in the SEED
Source: PubMed Central journal article supplement (PMC1868769; doi:10.1186/1471-2105-8-139), 2007-04-26
Supplement: 1471-2105-8-139-S4.pdf [file 1471-2105-8-139-S4.pdf]

### Distribution of reverse-engineered reactions from *S. aureus* iSB619 model

|                                             |                                        |                              |                 |
|---------------------------------------------|----------------------------------------|------------------------------|-----------------|
| Reactions to Reverse Engineer               | Total Number of Reactions <sup>a</sup> |                              | 427             |
|                                             |                                        |                              | Reaction Counts |
|                                             | Reactions Added “As is” <sup>b</sup>   |                              | 33              |
|                                             | Reactions Mapped to Functional Roles   | Exact match to KEGG reaction | 365             |
| Inexact match to KEGG reaction <sup>c</sup> |                                        | 29                           |                 |

<sup>a.</sup> Reaction total does not include transport and exchange reactions, and “dead end” reactions (*i.e.*, reactions whose substrates are never produced or whose products are never consumed) specified by the published model.

<sup>b.</sup> Reactions in *iSB619* model that combine many reactions into one for synthesis of *S. aureus* specific properties (*e.g.*, fatty acid synthesis).

<sup>c.</sup> Reactions in the model that differ slightly from the KEGG reaction database (*e.g.*, cofactor usage).
